# Supplementary material for: Variant landscape of the RYR1 gene based on whole genome sequencing of the Singaporean population
Source: bioRxiv or medRxiv preprint supplement (doi:10.1101/2021.08.11.21261947), 2021-08-12
Supplement: Supplementary file [file media-7.pdf]

Online resource table S4: Conservation of mutation sites. Evidence was obtained from Clinvar.

| Variant                             | Clinical significance | Evidence                                                                                                                                                                                                                                                                                      |
|-------------------------------------|-----------------------|-----------------------------------------------------------------------------------------------------------------------------------------------------------------------------------------------------------------------------------------------------------------------------------------------|
| <b>c.325C&gt;T (p.Arg109Trp)</b>    | Pathogenic            | This sequence change replaces arginine with tryptophan at codon 109 of the <i>RYR1</i> protein (p.Arg109Trp). The arginine residue is highly conserved and there is a moderate physicochemical difference between arginine and tryptophan.                                                    |
| <b>c.6487C&gt;T (p.Arg2163Cys)</b>  | Pathogenic            | The R2163C variant is a non-conservative amino acid substitution, which occurs at a position that is conserved across species.                                                                                                                                                                |
| <b>c.7268T&gt;A (p.Met2423Lys)</b>  | Pathogenic            | In 3 sibs with minicore myopathy with external ophthalmoplegia (255320) originally reported by Swash and Schwartz (1981), Jungbluth et al. (2005) identified a 7268T-A transversion in exon 45 the <i>RYR1</i> gene, resulting in a met2423-to-lys substitution in a highly conserved region. |
| <b>c.14111C&gt;T (p.Thr4704Met)</b> | Pathogenic            | This sequence change replaces threonine with methionine at codon 4709 of the <i>RYR1</i> protein (p.Thr4709Met). The threonine residue is highly conserved and there is a moderate physicochemical difference between threonine and methionine.                                               |
| <b>c.742G&gt;T (p.Gly248Trp)</b>    | Likely pathogenic     | No evidence about the conservation of the mutation site.                                                                                                                                                                                                                                      |
| <b>c.1186G&gt;T (p.Glu396X)</b>     | Likely pathogenic     | No evidence about the conservation of the mutation site.                                                                                                                                                                                                                                      |
| <b>c.2654G&gt;A (p.Arg885His)</b>   | Likely pathogenic     | This sequence change replaces arginine with histidine at codon 885 of the <i>RYR1</i> protein (p.Arg885His). The arginine residue is highly conserved and there is a small physicochemical difference between arginine and histidine.                                                         |
| <b>c.8554C&gt;T (p.Arg2852X)</b>    | Likely pathogenic     | No evidence about the conservation of the mutation site.                                                                                                                                                                                                                                      |
