# Supplementary material for: Variant landscape of the RYR1 gene based on whole genome sequencing of the Singaporean population
Source: bioRxiv or medRxiv preprint supplement (doi:10.1101/2021.08.11.21261947), 2021-08-12
Supplement: Supplementary file [file media-8.pdf]

Online resource table S5: Allele frequencies of the pathogenic and likely pathogenic *RYR1* variants

| Variant    | All_AF (%) | CHS_AF (%) | INS_AF (%) | MAS_AF (%) | ExAC_ALL (%) | GnomAD_exome_ALL (%) | AMR_AF (%)                     | NFE_AF (%)                 | SAS_AF (%)                            | SEA_AF (%)           | NEA_AF (%)           |
|------------|------------|------------|------------|------------|--------------|----------------------|--------------------------------|----------------------------|---------------------------------------|----------------------|----------------------|
| c.325C>T   | 0.01       | 0.018      | 0          | 0          | 0.01         | 0.008                | 0.009 (ExAC)<br>0.003 (gnomAD) | 0.02 (ExAC)<br>0 (gnomAD)  | 0.006 (ExAC)<br>0 (gnomAD)            | Nil                  | Nil                  |
| c.6487C>T  | 0.01       | 0          | 0          | 0.055      | Nil          | 0.001                | 0.003 (gnomAD)                 | 0 (gnomAD)                 | 0.02 (gnomAD)                         | Nil                  | Nil                  |
| c.7268T>A  | 0.03       | 0          | 0.133      | 0          | 0.004        | 0.002                | 0 (ExAC)<br>0.02 (gnomAD)      | 0 (ExAC and gnomAD)        | 0.03 (ExAC)<br>0 (gnomAD)             | Nil                  | Nil                  |
| c.14111C>T | 0.01       | 0          | 0.044      | 0          | 0.002        | 0.004                | 0 (ExAC)<br>0.003 (gnomAD)     | 0.003 (ExAC)<br>0 (gnomAD) | 0 (ExAC and gnomAD)                   | Nil                  | Nil                  |
| c.742G>T   | 0.01       | 0.018      | 0          | 0          | 0.001        | 0.001                | 0 (ExAC and gnomAD)            | 0 (ExAC and gnomAD)        | 0 (ExAC and gnomAD)<br>0.069 (genome) | 0 (genome asia 100K) | 0 (genome asia 100k) |

|           |       |       |       |       |       |       |                                  |                                      | asia<br>100k)                       |     |     |
|-----------|-------|-------|-------|-------|-------|-------|----------------------------------|--------------------------------------|-------------------------------------|-----|-----|
| c.1186G>T | 0.03  | 0     | 0     | 0.166 | 0.001 | 0.001 | 0 (ExAC<br>and<br>gnomAD<br>)    | 0.002<br>(ExAC)<br>0<br>(gnomA<br>D) | 0 (ExAC<br>and<br>gnomAD<br>)       | Nil | Nil |
| c.2654G>A | 0.031 | 0     | 0.133 | 0     | 0.02  | 0.02  | 0 (ExAC)<br>0.04<br>(gnomA<br>D) | 0.02<br>(ExAC)<br>0<br>(gnomA<br>D)  | 0.04<br>(ExAC)<br>0<br>(gnomA<br>D) | Nil | Nil |
| c.8554C>T | 0.01  | 0.018 | 0     | 0     | Nil   | 0     | 0<br>(gnomA<br>D)                | 0<br>(gnomA<br>D)                    | 0<br>(gnomA<br>D)                   | Nil | Nil |

Orange: defined as pathogenic in this study; Blue: defined as likely pathogenic in this study.

Abbreviations: All\_AF: allele frequency in the Singapore population; CHS\_AF: allele frequency amongst Chinese; INS: allele frequency amongst Indians; MAS: allele frequency amongst Malays; ExAC\_ALL: allele frequency in the ExAC browser; GnomAD\_exome ALL: allele frequency in the gnomAD browser; AMR\_AF: allele frequency in the American population; NFE\_AF: allele frequency in the Non-Finnish European population; SAS\_AF: allele frequency in the South Asian population; SEA\_AF: allele frequency in the Southeast Asian population; NEA\_AF: allele frequency in the Northeast Asian population. Nil: no data available
